# Supplementary material for: Plasmodium falciparum adapts its investment into replication versus transmission according to the host environment
Source: eLife. 2023 Mar 14;12:e85140. doi: 10.7554/eLife.85140 (PMC10059685; doi:10.7554/eLife.85140)
Supplement: Supplementary file 1. [file elife-85140-supp1.xlsx]

## Sheet: supptable1
variable	clincat	n	median (IQR)	wilcox.test fdr	asy	mild	moderate	rd	ic	sma	rd/ic	sma/rd	ic/sma	ic/sma/rd
Age (in months)	asy	47	58.9 (25.4,52.5)	asy
	mild	185	50 ( 29,53.5)	mild	NS
	moderate	146	41 ( 22,46.3)	moderate	NS	NS
	rd	27	41 (31.5,46.3)	rd	NS	NS	NS
	ic	185	39 ( 25,42.4)	ic	NS	0.00397	NS	NS
	sma	58	25 ( 12,28.4)	sma	0.00147	1.01e-07	0.000423	0.00135	0.000423
	rd/ic	65	34 ( 23,37.4)	rd/ic	0.0493	0.00135	NS	NS	NS	0.0307
	sma/rd	6	31.5 (27.5, 34)	sma/rd	NS	NS	NS	NS	NS	NS	NS
	ic/sma	19	26 ( 14,25.4)	ic/sma	0.00756	0.000765	0.0154	0.00424	0.0147	NS	NS	NS
	ic/sma/rd	17	24 ( 11,25.2)	ic/sma/rd	0.0131	0.00089	0.02	0.00424	0.0181	NS	NS	NS	NS
variable	clincat	n	median (IQR)	wilcox.test fdr	asy	mild	moderate	rd	ic	sma	rd/ic	sma/rd	ic/sma	ic/sma/rd
Parasites/μL x10^3	asy	50	2.28 (0.84,23.8)	asy
	mild	199	150 (35.1, 202)	mild	5.29e-18
	moderate	147	228 (81.2, 334)	moderate	5.29e-18	0.0166
	rd	27	272 (35.8, 393)	rd	6.04e-09	NS	NS
	ic	185	150 ( 22, 310)	ic	2.2e-14	NS	NS	NS
	sma	58	190 (75.2, 277)	sma	4.24e-14	NS	NS	NS	NS
	rd/ic	65	260 ( 50, 356)	rd/ic	1.02e-12	0.0166	NS	NS	NS	NS
	sma/rd	6	252 ( 172, 267)	sma/rd	0.00135	NS	NS	NS	NS	NS	NS
	ic/sma	19	130 (42.6, 329)	ic/sma	5.55e-07	NS	NS	NS	NS	NS	NS	NS
	ic/sma/rd	17	97.2 ( 13, 263)	ic/sma/rd	7.35e-05	NS	NS	NS	NS	NS	NS	NS	NS
variable	clincat	n	median (IQR)	wilcox.test fdr	asy	mild	moderate	rd	ic	sma	rd/ic	sma/rd	ic/sma	ic/sma/rd
PfHRP2, ng/μL	asy	38	11.7 (3.44, 105)	asy
	mild	174	89.3 (23.9, 198)	mild	9.59e-09
	moderate	126	239 (43.6, 493)	moderate	5.54e-10	0.000276
	rd	21	239 (86.7, 679)	rd	2.88e-06	0.012	NS
	ic	169	292 (53.3, 567)	ic	2.41e-11	1.49e-07	NS	NS
	sma	56	385 ( 158, 572)	sma	2.93e-10	1.02e-08	0.0216	NS	NS
	rd/ic	58	373 (93.9, 547)	rd/ic	2e-09	2.71e-06	NS	NS	NS	NS
	sma/rd	6	756 ( 237, 823)	sma/rd	0.00327	0.0451	NS	NS	NS	NS	NS
	ic/sma	18	482 ( 314, 663)	ic/sma	2.94e-06	9.21e-06	0.0237	NS	NS	NS	NS	NS
	ic/sma/rd	15	739 ( 386, 998)	ic/sma/rd	2.55e-06	9.9e-06	0.00667	NS	0.0204	NS	NS	NS	NS
variable	clincat	n	median (IQR)	wilcox.test fdr	asy	mild	moderate	rd	ic	sma	rd/ic	sma/rd	ic/sma	ic/sma/rd
Fever duration	mild	60	2 ( 1, 2.6)	mild	N/A
	moderate	94	3 ( 2,3.98)	moderate	N/A	NS
	rd	20	3 ( 2,2.85)	rd	N/A	NS	NS
	ic	103	2 ( 1,2.74)	ic	N/A	NS	NS	NS
	sma	30	3 ( 2, 3.6)	sma	N/A	0.0383	NS	NS	0.0383
	rd/ic	53	3 ( 2,2.43)	rd/ic	N/A	NS	NS	NS	NS	0.0383
	sma/rd	4	4 (3.75,5.25)	sma/rd	N/A	NS	NS	NS	NS	NS	NS
	ic/sma	12	3 ( 2,2.83)	ic/sma	N/A	NS	NS	NS	NS	NS	NS	NS
	ic/sma/rd	12	3 (1.75,3.58)	ic/sma/rd	N/A	NS	NS	NS	NS	NS	NS	NS	NS
variable	clincat	n	median (IQR)	wilcox.test fdr	asy	mild	moderate	rd	ic	sma	rd/ic	sma/rd	ic/sma	ic/sma/rd
Temperature, °C	asy	50	36.7 (36.3,36.7)	asy
	mild	82	38.8 (37.8,38.7)	mild	3.03e-15
	moderate	123	38.8 (37.8,38.6)	moderate	5.4e-18	NS
	rd	25	38.2 (37.6,38.4)	rd	8.74e-09	NS	NS
	ic	166	38.4 (37.5,38.3)	ic	3.03e-15	0.0399	0.0399	NS
	sma	48	38 (37.2,38.1)	sma	1.95e-09	0.0351	0.0351	NS	NS
	rd/ic	64	38.4 (37.5,38.3)	rd/ic	1.13e-10	NS	NS	NS	NS	NS
	sma/rd	5	37.6 (37.2,37.7)	sma/rd	NS	NS	NS	NS	NS	NS	NS
	ic/sma	17	38.1 (37.3,37.8)	ic/sma	0.0022	0.0399	0.0399	NS	NS	NS	NS	NS
	ic/sma/rd	16	37.5 (37.1,37.5)	ic/sma/rd	0.00136	0.00142	0.00162	0.0399	0.023	NS	0.0486	NS	NS
variable	clincat	n	Number (%)	chi.square.test	chi.square	fdr
Temp ≥38°C	asy	50	1 (0.244)	asy	N/A	N/A
	mild	82	59 (14.4)	mild	6.4	0.019
	moderate	123	85 (20.7)	moderate	6.57	0.019
	rd	110	63 (15.4)	rd	0.0383	0.84
	ic	263	163 (39.8)	ic	2.02	0.19
	sma	86	39 (9.51)	sma	6.6	0.019
