# Supplementary material for: Plasmodium falciparum adapts its investment into replication versus transmission according to the host environment
Source: eLife. 2023 Mar 14;12:e85140. doi: 10.7554/eLife.85140 (PMC10059685; doi:10.7554/eLife.85140)
Supplement: Supplementary file 2. [file elife-85140-supp2.xlsx]

## Sheet: Fig2
	FDR									coefficient (95% confidence interval)
	ap2g	sir2a	hrp2	ap2g.predecline	sir2a.predecline	hrp2.predecline	ap2g.postdecline	sir2a.postdecline	hrp2.postdecline	ap2g	sir2a	hrp2	ap2g.predecline	sir2a.predecline	hrp2.predecline	ap2g.postdecline	sir2a.postdecline	hrp2.postdecline
parasitemia	0.949267	0.19211	0.000118936	0.228401	0.636305	0.00646703	0.681236	0.181591	0.0379211	0 (-0.07-0.08)	0.05 (-0.02-0.12)	0.16 (0.08-0.23)	-0.08 (-0.2-0.05)	0.06 (-0.18-0.29)	0.29 (0.1-0.49)	0.03 (-0.1-0.16)	0.2 (-0.09-0.49)	0.14 (0.01-0.27)
sir2a	6.69633e-57	NA	0.000466891	3.72989e-16	NA	0.728312	2.6681e-19	NA	0.00201468	0.55 (0.49-0.59)	1 (1-1)	-0.14 (-0.21--0.06)	0.27 (0.21-0.33)	1 (1-1)	0.02 (-0.08-0.12)	0.24 (0.2-0.29)	1 (1-1)	-0.1 (-0.16--0.04)

## Sheet: Fig3
	FDR								coefficient (95% confidence interval)										FDR												coefficient (95% confidence interval)
	ap2g	sir2a	ap2g.predecline	sir2a.predecline	ap2g.decline	sir2a.decline	ap2g.postdecline	sir2a.postdecline	ap2g	sir2a	ap2g.predecline	sir2a.predecline	ap2g.decline	sir2a.decline	ap2g.postdecline	sir2a.postdecline			ap2g	sir2a	temperature	ap2g.predecline	sir2a.predecline	temperature.predecline	ap2g.decline	sir2a.decline	temperature.decline	ap2g.postdecline	sir2a.postdecline	temperature.postdecline	ap2g	sir2a	temperature	ap2g.predecline	sir2a.predecline	temperature.predecline	ap2g.decline	sir2a.decline	temperature.decline	ap2g.postdecline	sir2a.postdecline	temperature.postdecline
ifng	0.292507	0.915705	0.996535	0.975092	0.914009	0.99341	0.136874	0.591723	-0.01 (-0.03-0)	0 (-0.03-0.04)	0 (-0.03-0.03)	0.01 (-0.05-0.06)	0 (-0.03-0.03)	-0.03 (-0.08-0.03)	-0.03 (-0.06-0)	0.04 (-0.03-0.1)		F1	0.790637	0.557855	9.04144e-20	0.724465	0.860524	8.139e-07	0.930578	0.542831	9.45092e-08	0.386537	0.519979	5.3356e-07	-0.01 (-0.05-0.04)	0.04 (-0.06-0.13)	0.33 (0.26-0.39)	0.02 (-0.08-0.11)	-0.03 (-0.22-0.16)	0.41 (0.27-0.56)	0 (-0.08-0.09)	0.06 (-0.1-0.22)	0.36 (0.24-0.48)	-0.04 (-0.1-0.03)	0.06 (-0.09-0.22)	0.27 (0.17-0.37)
il18	0.32386	0.469243	0.996535	0.975092	0.896109	0.121891	0.490845	0.966533	-0.01 (-0.03-0)	-0.02 (-0.06-0.01)	-0.01 (-0.03-0.02)	0 (-0.05-0.05)	-0.01 (-0.03-0.02)	-0.06 (-0.11--0.01)	-0.01 (-0.05-0.02)	0.01 (-0.07-0.08)		F2	0.0256776	0.197094	0.977742	0.724465	0.860524	0.811124	0.420048	0.542831	0.846509	0.0387932	0.0702703	0.706183	-0.06 (-0.1--0.01)	-0.08 (-0.17-0.02)	0 (-0.07-0.08)	-0.03 (-0.13-0.07)	-0.02 (-0.22-0.18)	0.02 (-0.16-0.21)	-0.04 (-0.12-0.04)	-0.05 (-0.21-0.11)	0.01 (-0.12-0.15)	-0.08 (-0.15--0.02)	-0.17 (-0.32--0.02)	-0.02 (-0.12-0.08)
ip10	0.514808	0.0578495	0.996535	0.975092	0.896109	0.99341	0.967847	0.0407705	0.01 (-0.01-0.03)	0.05 (0.01-0.09)	0.02 (-0.01-0.06)	0.01 (-0.05-0.08)	0.02 (-0.01-0.04)	0.03 (-0.03-0.09)	0 (-0.03-0.03)	0.11 (0.03-0.18)		F3	0.324952	0.979048	0.251149	0.625015	0.860524	0.811124	0.420048	0.542831	0.846509	0.871786	0.727039	0.16091	-0.03 (-0.07-0.02)	0 (-0.09-0.1)	-0.05 (-0.12-0.03)	-0.05 (-0.13-0.03)	0.04 (-0.12-0.2)	-0.02 (-0.17-0.13)	-0.05 (-0.13-0.02)	-0.07 (-0.21-0.08)	0.02 (-0.1-0.15)	0.01 (-0.07-0.08)	0.03 (-0.15-0.21)	-0.1 (-0.21-0.02)
il1ra	0.0193391	0.000217923	0.996535	0.975092	0.000448854	0.027446	0.490845	0.00348786	0.03 (0.01-0.05)	0.09 (0.05-0.13)	0.01 (-0.02-0.04)	0 (-0.06-0.07)	0.07 (0.04-0.1)	0.1 (0.04-0.16)	0.02 (-0.02-0.06)	0.16 (0.07-0.25)		F4	4.73469e-08	1.49997e-08	1.53009e-05	0.160108	0.102772	0.00071231	7.9192e-07	0.0359438	1.32142e-05	0.0210161	1.25992e-06	0.511369	0.12 (0.08-0.16)	0.26 (0.18-0.35)	0.15 (0.09-0.22)	0.07 (0.01-0.14)	0.16 (0.03-0.3)	0.22 (0.1-0.34)	0.18 (0.12-0.25)	0.18 (0.05-0.32)	0.26 (0.15-0.36)	0.11 (0.04-0.19)	0.44 (0.28-0.61)	0.05 (-0.07-0.17)
mip1a	0.32386	0.0237011	0.996535	0.480743	0.465379	0.99341	0.490845	0.0578421	0.01 (0-0.02)	0.04 (0.01-0.07)	0 (-0.02-0.02)	0.04 (0-0.08)	0.02 (0-0.04)	0.01 (-0.03-0.05)	0.01 (-0.01-0.04)	0.08 (0.02-0.13)		F5	0.0256776	0.197094	9.52429e-07	0.724465	0.860524	0.0420519	0.420048	0.147409	0.0300592	0.0445839	0.448875	0.000574235	-0.05 (-0.08--0.01)	-0.07 (-0.14-0.01)	-0.15 (-0.21--0.1)	-0.01 (-0.07-0.04)	0.01 (-0.11-0.13)	-0.12 (-0.23--0.02)	-0.03 (-0.08-0.02)	-0.1 (-0.2-0)	-0.11 (-0.19--0.02)	-0.08 (-0.15--0.01)	-0.09 (-0.25-0.07)	-0.2 (-0.31--0.1)
il6	0.000136877	0.000217923	0.996535	0.726362	0.0135802	0.474456	0.0788189	0.00256143	0.05 (0.03-0.07)	0.1 (0.05-0.14)	0.03 (-0.01-0.07)	0.07 (-0.01-0.15)	0.06 (0.02-0.1)	0.07 (-0.01-0.14)	0.05 (0.01-0.08)	0.15 (0.07-0.23)
il10	3.10573e-06	8.54428e-07	0.875074	0.480743	0.00383215	0.388127	0.0367879	1.46721e-05	0.06 (0.04-0.09)	0.14 (0.09-0.19)	0.05 (0.01-0.09)	0.09 (0.01-0.17)	0.08 (0.04-0.12)	0.08 (0-0.17)	0.07 (0.03-0.11)	0.23 (0.15-0.32)
mcp1	3.10573e-06	8.54428e-07	0.996535	0.726362	3.75508e-08	0.023244	0.152986	0.000518992	0.05 (0.03-0.07)	0.11 (0.07-0.15)	0.03 (0-0.06)	0.06 (-0.01-0.13)	0.09 (0.07-0.12)	0.11 (0.05-0.17)	0.03 (0-0.07)	0.16 (0.09-0.24)
sdf1a	0.292507	0.915705	0.996535	0.975092	0.896109	0.99341	0.490845	0.966533	-0.03 (-0.06-0)	-0.01 (-0.07-0.06)	-0.03 (-0.09-0.03)	0.02 (-0.1-0.13)	-0.03 (-0.08-0.02)	-0.04 (-0.14-0.07)	-0.02 (-0.08-0.03)	-0.01 (-0.13-0.11)
mip1b	0.292507	0.135069	0.996535	0.780453	0.896109	0.99341	0.394076	0.153387	0.02 (0-0.04)	0.05 (0.01-0.09)	0 (-0.03-0.03)	0.05 (-0.01-0.12)	0.02 (-0.01-0.06)	0 (-0.07-0.07)	0.02 (-0.01-0.06)	0.09 (0-0.18)
il21	0.497574	0.696748	0.996535	0.975092	0.896109	0.99341	0.743344	0.392319	-0.01 (-0.04-0.01)	0.02 (-0.03-0.08)	-0.02 (-0.06-0.03)	0.03 (-0.06-0.12)	-0.02 (-0.06-0.03)	-0.02 (-0.11-0.06)	-0.01 (-0.05-0.03)	0.07 (-0.02-0.16)
il1a	0.944183	0.915705	0.996535	0.975092	0.896109	0.99341	0.568384	0.848282	0 (-0.03-0.02)	0.01 (-0.04-0.06)	-0.02 (-0.06-0.02)	0.02 (-0.07-0.1)	-0.02 (-0.06-0.02)	-0.03 (-0.11-0.05)	0.02 (-0.02-0.06)	0.02 (-0.07-0.12)
il22	0.944183	0.469243	0.996535	0.975092	0.896109	0.99341	0.707948	0.405144	0 (-0.03-0.03)	0.04 (-0.02-0.11)	-0.02 (-0.07-0.03)	0.04 (-0.07-0.15)	-0.01 (-0.07-0.04)	0 (-0.1-0.1)	0.02 (-0.04-0.07)	0.09 (-0.03-0.2)
rantes	0.158711	0.469243	0.996535	0.975092	0.896109	0.99341	0.0548226	0.591723	-0.02 (-0.04-0)	-0.02 (-0.06-0.01)	0 (-0.03-0.03)	-0.01 (-0.07-0.06)	-0.01 (-0.03-0.02)	-0.01 (-0.07-0.04)	-0.04 (-0.07--0.01)	-0.04 (-0.1-0.03)
il8	0.789303	0.294382	0.996535	0.975092	0.641373	0.99341	0.743344	0.585823	0.01 (-0.02-0.03)	0.05 (-0.01-0.1)	0 (-0.05-0.05)	0.06 (-0.04-0.15)	0.04 (-0.01-0.08)	0.03 (-0.05-0.12)	-0.01 (-0.05-0.03)	0.05 (-0.03-0.14)
tnfb	0.32386	0.758796	0.996535	0.975092	0.896109	0.99341	0.215959	0.900536	-0.03 (-0.08-0.01)	-0.03 (-0.13-0.06)	0 (-0.09-0.09)	-0.04 (-0.23-0.15)	-0.03 (-0.12-0.06)	-0.05 (-0.22-0.13)	-0.06 (-0.12-0.01)	-0.03 (-0.18-0.12)
groa	0.267048	0.933209	0.996535	0.975092	0.896109	0.99341	0.136874	0.997328	-0.02 (-0.05-0)	0 (-0.05-0.06)	-0.02 (-0.08-0.04)	0.01 (-0.11-0.13)	-0.01 (-0.05-0.04)	0 (-0.09-0.09)	-0.04 (-0.07-0)	0 (-0.08-0.08)
il31	0.292507	0.758796	0.996535	0.975092	0.896109	0.99341	0.136874	0.680478	-0.03 (-0.07-0.01)	-0.02 (-0.1-0.05)	0 (-0.08-0.07)	-0.04 (-0.2-0.12)	-0.02 (-0.09-0.05)	0 (-0.14-0.13)	-0.05 (-0.1-0)	-0.06 (-0.17-0.06)
il13	0.266358	0.469243	0.996535	0.975092	0.896109	0.99341	0.0724318	0.114743	-0.03 (-0.07-0)	-0.05 (-0.12-0.02)	0 (-0.07-0.08)	-0.01 (-0.16-0.14)	-0.02 (-0.09-0.04)	-0.02 (-0.14-0.1)	-0.07 (-0.12--0.02)	-0.13 (-0.24--0.02)
ifna	0.944183	0.313341	0.996535	0.975092	0.896109	0.99341	0.942861	0.405144	0.01 (-0.03-0.05)	0.07 (-0.01-0.16)	0.01 (-0.07-0.09)	0.02 (-0.14-0.19)	0.02 (-0.05-0.09)	0.06 (-0.07-0.2)	0 (-0.07-0.06)	0.11 (-0.03-0.26)
eotaxin	0.273024	0.991877	0.996535	0.975092	0.896109	0.99341	0.0838122	0.848282	-0.02 (-0.03-0)	0 (-0.03-0.03)	0 (-0.03-0.03)	-0.01 (-0.07-0.05)	0 (-0.03-0.03)	0.02 (-0.04-0.07)	-0.03 (-0.06--0.01)	-0.02 (-0.08-0.05)
il9	0.32386	0.816044	0.996535	0.975092	0.896109	0.99341	0.136874	0.848282	-0.02 (-0.05-0.01)	0.02 (-0.04-0.08)	0 (-0.07-0.06)	0.02 (-0.12-0.15)	-0.01 (-0.06-0.05)	0 (-0.1-0.11)	-0.04 (-0.08-0)	0.02 (-0.07-0.12)
tnfa	0.944183	0.521005	0.996535	0.975092	0.896109	0.99341	0.490845	0.900536	0 (-0.02-0.02)	0.02 (-0.02-0.06)	0.01 (-0.02-0.05)	0.01 (-0.06-0.08)	0 (-0.03-0.04)	0.03 (-0.04-0.11)	-0.01 (-0.04-0.01)	0.01 (-0.05-0.07)
il12p70	0.953185	0.241981	0.996535	0.975092	0.896109	0.99341	0.946038	0.114743	0 (-0.02-0.02)	0.04 (0-0.07)	0 (-0.04-0.03)	0.01 (-0.06-0.08)	0 (-0.03-0.03)	0.01 (-0.04-0.07)	0 (-0.03-0.03)	0.08 (0.01-0.16)
il2	0.944183	0.521005	0.996535	0.975092	0.896109	0.99341	0.26108	0.991822	0 (-0.01-0.01)	0.02 (-0.01-0.05)	0.01 (-0.02-0.03)	0.03 (-0.03-0.08)	0.01 (-0.02-0.04)	0.03 (-0.02-0.08)	-0.02 (-0.04-0.01)	0 (-0.05-0.05)
il5	0.944183	0.758796	0.996535	0.987924	0.896109	0.99341	0.921062	0.997328	0 (-0.02-0.03)	0.01 (-0.03-0.06)	0.01 (-0.04-0.05)	0 (-0.09-0.09)	0.01 (-0.04-0.05)	0.04 (-0.05-0.12)	0 (-0.04-0.03)	0 (-0.07-0.08)
il15	0.32386	0.915705	0.996535	0.975092	0.896109	0.99341	0.136874	0.848282	-0.01 (-0.03-0)	0 (-0.03-0.04)	0 (-0.04-0.04)	-0.02 (-0.1-0.05)	0 (-0.04-0.03)	0 (-0.06-0.07)	-0.03 (-0.06-0)	0.02 (-0.05-0.08)
il1b	0.944183	0.469243	0.996535	0.975092	0.896109	0.99341	0.220905	0.769549	0 (-0.03-0.02)	0.03 (-0.02-0.08)	0.03 (-0.02-0.07)	0.03 (-0.06-0.12)	0.01 (-0.03-0.05)	0.02 (-0.05-0.1)	-0.03 (-0.07-0.01)	0.03 (-0.06-0.12)
il17a	0.32386	0.915705	0.996535	0.975092	0.896109	0.99341	0.152986	0.997328	-0.01 (-0.03-0.01)	0 (-0.03-0.04)	0 (-0.04-0.03)	-0.01 (-0.08-0.06)	-0.01 (-0.04-0.03)	0.01 (-0.06-0.07)	-0.03 (-0.05-0)	0 (-0.06-0.07)
il23	0.32386	0.758796	0.996535	0.975092	0.896109	0.99341	0.147023	0.761622	-0.01 (-0.03-0.01)	0.01 (-0.02-0.05)	0 (-0.03-0.03)	0 (-0.07-0.07)	0 (-0.04-0.03)	0.01 (-0.05-0.07)	-0.03 (-0.05-0)	0.02 (-0.04-0.08)
il27	0.514808	0.915705	0.996535	0.975092	0.896109	0.99341	0.215959	0.900536	-0.02 (-0.05-0.02)	-0.01 (-0.08-0.06)	0.01 (-0.06-0.07)	-0.03 (-0.17-0.11)	-0.01 (-0.06-0.05)	0 (-0.11-0.11)	-0.04 (-0.09-0.01)	-0.02 (-0.13-0.09)
il7	0.572477	0.915705	0.996535	0.975092	0.896109	0.99341	0.136874	0.730288	-0.01 (-0.03-0.01)	0.01 (-0.03-0.05)	0.01 (-0.03-0.04)	0 (-0.08-0.08)	0.01 (-0.03-0.04)	0.04 (-0.03-0.1)	-0.03 (-0.06-0)	-0.03 (-0.1-0.04)
il4	0.944183	0.752959	0.996535	0.975092	0.896109	0.99341	0.891348	0.769549	0 (-0.02-0.02)	0.02 (-0.03-0.06)	0 (-0.04-0.04)	0.01 (-0.07-0.09)	-0.01 (-0.04-0.03)	0 (-0.07-0.07)	-0.01 (-0.04-0.03)	0.03 (-0.05-0.12)
gmcsf	0.944183	0.758796	0.996535	0.975092	0.896109	0.99341	0.490845	0.591723	0 (-0.02-0.01)	0.01 (-0.02-0.05)	0 (-0.03-0.03)	-0.02 (-0.09-0.05)	0.01 (-0.03-0.04)	0.01 (-0.05-0.07)	-0.01 (-0.04-0.01)	0.03 (-0.03-0.09)

## Sheet: Fig4A
Lipid.id	names	coef_F1	coef_F2	coef_F3	coef_F4	coef_F5	fdr.F1	fdr.F2	fdr.F3	fdr.F4	fdr.F5
id_2781	Hexanoylcarnitine	-0.507754	-0.0704499	0.761864	0.217095	0.89794	0.622517	0.935765	0.203893	0.875973	0.0281768
id_3124	L-Octanoylcarnitine	-0.461902	-0.234284	0.672946	0.165507	0.85495	0.622517	0.758779	0.265172	0.924726	0.0296382
id_4225	LysoPC(14:0)	0.388807	-0.0417699	-0.0216157	-0.865548	-0.451721	0.622517	0.950078	0.95743	0.0386652	0.148285
id_8017	LysoPC(15:0)	0.364313	0.169497	-0.0949789	-0.869991	-0.398877	0.622517	0.773618	0.917613	0.0305185	0.188586
id_27	LysoPC(16:0)	-0.170526	0.9227	-0.91887	-1.35489	0.041946	0.898893	0.522446	0.25824	0.0386652	0.934823
id_422	LysoPC(18:2)	0.570639	0.338488	-0.0356608	-0.508635	-1.03656	0.625409	0.758554	0.95743	0.704518	0.0467971
id_6205	LysoPE(16:0)	-0.622394	0.103708	-0.103938	-0.0631822	1.14227	0.600087	0.900861	0.925296	0.965923	0.0118358
id_548	PC(32:1)	0.422703	-0.0507185	2.06184	-0.865633	-0.541138	0.68842	0.967254	0.039109	0.409718	0.330009
id_4523	PC(33:2)	0.410439	0.420271	1.25429	-0.668134	-1.20262	0.68842	0.735307	0.114519	0.570091	0.0303461
id_17	PC(34:2)	0.664108	0.766218	1.89367	-0.617861	-1.34512	0.625409	0.545484	0.0541309	0.768827	0.0476871
id_2341	PC(34:3).a	0.503478	0.321297	1.23303	-0.357461	-1.12676	0.642269	0.758779	0.126552	0.866442	0.0431525
id_5403	PC(34:3).b	0.620077	0.79059	0.732321	0.278063	-1.22786	0.625409	0.531395	0.45098	0.919319	0.0363833
id_2211	PC(35:2)	0.368314	0.355613	1.3945	-0.403109	-1.3639	0.761977	0.758779	0.104379	0.866442	0.0281768
id_338	PC(36:3)	1.44199	0.969592	1.61021	0.206754	-1.96615	0.455853	0.531679	0.130787	0.937425	0.0118358
id_68	PC(36:4)	0.57048	0.952226	1.52756	-0.103594	-1.46982	0.653301	0.526882	0.105526	0.965923	0.0284287
id_252	PC(38:6)	0.855949	0.79431	1.55134	-0.184157	-1.69983	0.622517	0.545484	0.130787	0.939701	0.0226013
id_716	PC(40:6)	0.414699	0.723413	1.4051	-0.0307528	-1.37611	0.717801	0.541026	0.105526	0.986491	0.0281768
id_6664	PC(40:7)	0.443247	0.666653	1.23472	0.142088	-1.53267	0.681883	0.545484	0.135827	0.943013	0.0118358
id_3101	PE(36:2)	0.211917	0.298723	1.75877	0.0499322	-0.498335	0.863749	0.759874	0.039109	0.965956	0.325969
id_4234	PE(38:7).a	0.994512	0.638948	1.01114	0.323767	-1.24428	0.49239	0.545484	0.261586	0.868977	0.0303461
id_3492	PE(38:7).b	0.670093	0.987999	0.369651	0.889676	-1.62171	0.622517	0.522446	0.781583	0.369212	0.00976881
id_6967	SM 38:2;O2	-0.0793628	0.350693	-0.123461	0.32785	-0.832758	0.932397	0.660209	0.917613	0.822766	0.0402035
id_12678	SM(d18:2/22:1)	-0.163435	0.0519748	-0.121225	0.164642	-1.26046	0.898893	0.967254	0.925296	0.935102	0.0281768
id_8467	SP(20:0)	-0.0286609	0.0201379	-0.0795041	1.2632	-0.186948	0.973317	0.97516	0.925296	0.00101593	0.584173
lipid_stats	statistics associated with Figure 4A
Column	Description
Lipid.id	Lipid id
names	Lipid name as identified (see methods)
coef_F1	coefficient of the linear model for factor F1
coef_F2	coefficient of the linear model for factor F2
coef_F3	coefficient of the linear model for factor F3
coef_F4	coefficient of the linear model for factor F4
coef_F5	coefficient of the linear model for factor F5
fdr.F1	False discovery rate associated with factor F1
fdr.F2	False discovery rate associated with factor F2
fdr.F3	False discovery rate associated with factor F3
fdr.F4	False discovery rate associated with factor F4
fdr.F5	False discovery rate associated with factor F5

## Sheet: Fig4C
	FDR						coefficient (95% confidence interval)
Lipid	ap2g	sir2a	ap2g.decline	ap2g.postdecline	sir2a.decline	pfsir2a.postdecline	ap2g	sir2a	ap2g.decline	ap2g.postdecline	sir2a.decline	pfsir2a.postdecline
PC(34:2)	0.980294	0.621312	0.907586	0.763429	0.822339	0.537205	0 (-0.01-0.01)	0.01 (-0.01-0.02)	-2.66 (-11.11-5.79)	0.63 (-1.7-2.97)	0.64 (-2.82-4.09)	0.56 (-0.58-1.7)
PC(32:1)	0.980294	0.613591	0.907586	0.763429	0.917608	0.590125	0 (-0.01-0.01)	0.01 (-0.01-0.02)	-3.25 (-8.97-2.46)	0.71 (-1.38-2.8)	0.15 (-2.21-2.51)	0.34 (-0.69-1.36)
PC(34:3).a	0.980294	0.605099	0.907586	0.979631	0.822339	0.563337	0 (-0.01-0.01)	0.01 (-0.01-0.03)	-3.09 (-9.18-3.01)	0.03 (-1.98-2.04)	1.19 (-1.3-3.68)	0.38 (-0.6-1.36)
PC(35:2)	0.980294	0.534719	0.907586	0.763429	0.822339	0.450283	0 (-0.01-0.01)	0.01 (-0.01-0.03)	-1.15 (-7.53-5.23)	0.7 (-1.45-2.86)	1.19 (-1.39-3.77)	0.7 (-0.35-1.76)
PC(33:2)	0.980294	0.605099	0.907586	0.763429	0.822339	0.497317	0 (-0.01-0.01)	0.01 (-0.01-0.03)	-0.7 (-6.3-4.9)	0.65 (-1.39-2.68)	0.8 (-1.47-3.07)	0.54 (-0.46-1.53)
LysoPC(16:0)	0.179135	0.00185803	0.907586	0.000597094	0.822339	9.62811e-05	-0.01 (-0.02-0)	-0.04 (-0.06--0.02)	1.5 (-2.74-5.74)	-4.19 (-6.1--2.29)	-1.24 (-2.94-0.46)	-2.24 (-3.16--1.31)
LysoPC(18:2)	0.470194	0.621312	0.907586	0.374216	0.822339	0.792616	-0.01 (-0.02-0)	-0.01 (-0.03-0.01)	0.69 (-5.85-7.24)	-1.7 (-3.5-0.09)	-0.65 (-3.31-2.02)	-0.12 (-1.01-0.77)
PC(36:3)	0.980294	0.369704	0.907586	0.763429	0.822339	0.306261	0 (0-0.01)	0.01 (0-0.03)	-1.36 (-12.33-9.62)	1.39 (-1.09-3.88)	1.99 (-2.45-6.43)	1.09 (-0.12-2.3)
PC(36:4)	0.980294	0.525253	0.907586	0.763429	0.822339	0.497317	0 (-0.01-0.01)	0.01 (-0.01-0.02)	-2.68 (-9.78-4.41)	0.56 (-1.78-2.9)	1.01 (-1.89-3.91)	0.62 (-0.53-1.76)
PC(40:7)	0.980294	0.369704	0.907586	0.763429	0.822339	0.450283	0 (-0.01-0.01)	0.02 (0-0.03)	-1.28 (-7.27-4.7)	0.51 (-1.56-2.58)	1.9 (-0.48-4.28)	0.62 (-0.39-1.63)
PC(38:6)	0.980294	0.414513	0.907586	0.763429	0.822339	0.411961	0 (-0.01-0.01)	0.01 (0-0.03)	-3.68 (-12.36-5.01)	0.98 (-1.46-3.42)	0.92 (-2.64-4.48)	0.94 (-0.25-2.13)
PC(40:6)	0.980294	0.403757	0.907586	0.763429	0.822339	0.440537	0 (-0.01-0.01)	0.01 (0-0.03)	-2.02 (-8.3-4.27)	0.7 (-1.47-2.88)	1.23 (-1.32-3.78)	0.77 (-0.29-1.83)
LysoPE(16:0)	0.980294	0.534719	0.907586	0.763429	0.917608	0.440537	0 (-0.02-0.01)	-0.01 (-0.04-0.01)	-0.81 (-4.95-3.32)	-0.75 (-2.37-0.88)	-0.15 (-1.84-1.53)	-0.56 (-1.35-0.23)
Hexanoylcarnitine	0.980294	0.534719	0.907586	0.763429	0.822339	0.590125	0 (-0.01-0.01)	0.01 (-0.01-0.04)	-0.78 (-4.53-2.98)	0.62 (-0.92-2.16)	0.65 (-0.88-2.17)	-0.26 (-1.02-0.5)
PE(38:7).b	0.980294	0.369704	0.907586	0.763429	0.822339	0.306261	0 (-0.01-0.01)	0.02 (0-0.03)	-0.64 (-6.15-4.87)	0.51 (-1.48-2.51)	0.73 (-1.51-2.97)	0.9 (-0.07-1.87)
PE(38:7).a	0.980294	0.534719	0.907586	0.763429	0.822339	0.306261	0 (-0.01-0.01)	0.01 (-0.01-0.03)	-3.97 (-10.45-2.5)	0.72 (-1.31-2.74)	-0.6 (-3.28-2.07)	0.91 (-0.08-1.89)
L-Octanoylcarnitine	0.980294	0.62793	0.907586	0.979631	0.822339	0.788071	0 (-0.02-0.01)	0.01 (-0.02-0.03)	-0.52 (-4.37-3.32)	-0.04 (-1.53-1.44)	0.28 (-1.28-1.85)	-0.12 (-0.84-0.61)
SM 38:2;O2	0.980294	0.621811	0.91011	0.502658	0.822339	0.550823	0 (-0.02-0.01)	0.01 (-0.02-0.03)	-0.29 (-3.84-3.27)	-1.2 (-2.73-0.34)	0.42 (-1.03-1.86)	0.32 (-0.44-1.08)
SM(d18:2/22:1)	0.980294	0.644814	0.907586	0.763429	0.917608	0.550823	0 (-0.01-0.01)	0 (-0.02-0.01)	-0.58 (-4.62-3.47)	-1.14 (-3.5-1.21)	-0.09 (-1.74-1.57)	-0.53 (-1.68-0.63)
PE(36:2)	0.980294	0.514856	0.907586	0.764634	0.822339	0.450283	0 (-0.01-0.01)	0.01 (-0.01-0.03)	-3.85 (-8.94-1.23)	0.41 (-1.47-2.29)	1.06 (-1.05-3.16)	0.59 (-0.33-1.51)
PC(34:3).b	0.980294	0.644814	0.925196	0.790953	0.822339	0.624955	0 (-0.01-0.01)	0 (-0.01-0.02)	0.28 (-5.62-6.17)	-0.38 (-2.5-1.74)	0.63 (-1.77-3.03)	0.3 (-0.74-1.33)
LysoPC(14:0)	0.393278	0.369704	0.907586	0.0836245	0.822339	0.306261	-0.01 (-0.03-0)	-0.03 (-0.06-0.01)	0.48 (-2.84-3.81)	-1.51 (-2.66--0.36)	-0.49 (-1.84-0.86)	-0.58 (-1.15--0.01)
LysoPC(15:0)	0.227651	0.128861	0.907586	0.0332875	0.822339	0.0580998	-0.02 (-0.03-0)	-0.04 (-0.07--0.01)	0.43 (-2.84-3.7)	-1.69 (-2.78--0.59)	-0.66 (-1.98-0.66)	-0.78 (-1.32--0.24)
SP(20:0)	0.393278	0.369704	0.907586	0.469674	0.822339	0.550823	0.01 (0-0.03)	0.03 (0-0.06)	0.93 (-1.83-3.69)	1.12 (-0.21-2.45)	0.33 (-0.8-1.46)	0.27 (-0.38-0.93)
