# Supplementary material for: Plasmodium falciparum adapts its investment into replication versus transmission according to the host environment
Source: eLife. 2023 Mar 14;12:e85140. doi: 10.7554/eLife.85140 (PMC10059685; doi:10.7554/eLife.85140)
Supplement: Supplementary file 3. — The model assumes that pre-existing host immunity affects the interaction between the host (i.e. altered within the host environment including inflammatory response. fever, nutritional resource availability) and parasite (i.e. altered investment in reproduction vs replication). Significant p-values are highlighted in bold and negative and positive estimates of associations are highlighted in blue and red, respectively. [file elife-85140-supp3.xlsx]

## Sheet: Factor_solution
						Two-Tailed
			Estimate	S.E.	Est./S.E.	P-Value
	F1	BY
		GMCSF	0.945	0.004	258.4	<0.001
		IL7	0.897	0.008	108.637	<0.001
		IL12P70	0.784	0.017	45.555	<0.001
		IFNA	0.729	0.022	33.843	<0.001
		IL1B	0.917	0.007	138.601	<0.001
		IL23	0.907	0.007	122.555	<0.001
		IL17A	0.935	0.005	175.26	<0.001
		IL27	0.925	0.006	152.285	<0.001
		IL2	0.862	0.011	79.053	<0.001
		IL15	0.933	0.005	172.057	<0.001
		IL4	0.874	0.01	87.091	<0.001
		IL5	0.891	0.009	102.018	<0.001
		TNFA	0.893	0.009	104.248	<0.001
		EOTAXIN	0.901	0.008	112.604	<0.001
	F2	BY
		IL13	0.82	0.012	66.74	<0.001
		IL31	0.937	0.008	111.983	<0.001
		GROA	0.886	0.012	72.621	<0.001
		TNFB	0.775	0.016	48.001	<0.001
		IL9	0.824	0.016	50.881	<0.001
		RANTES	0.325	0.032	10.253	<0.001
	F3	BY
		IL22	0.933	0.006	146.627	<0.001
		IL1A	0.937	0.006	147.326	<0.001
		IL21	0.886	0.009	101.946	<0.001
		MIP1B	0.783	0.014	56.817	<0.001
		SDF1A	0.735	0.016	44.98	<0.001
	F4	BY
		MCP1	0.864	0.009	101.374	<0.001
		IL10	0.827	0.016	53.074	<0.001
		IL6	0.907	0.011	85.72	<0.001
		MIP1A	0.719	0.023	31.372	<0.001
		IL1RA	0.683	0.025	27.038	<0.001
		IP10	0.622	0.029	21.19	<0.001
		IL8	0.73	0.023	31.696	<0.001
	F5	BY
		IL18	1.18	0.025	47.838	<0.001
		IFNG	0.638	0.026	24.774	<0.001

## Sheet: Structural part
predictions: impact of host immunity (represented by age and transmission period) on host inflammatory response and parasitemia
	Inflammation										Parasitemia
	F1		F2		F3		F4		F5		PfHRP2		parasite count
host immunity	Estimate(SE)	Pvalue	Estimate(SE)	Pvalue	Estimate(SE)	Pvalue	Estimate(SE)	Pvalue	Estimate(SE)	Pvalue	Estimate(SE)	Pvalue	Estimate(SE)	Pvalue
Age	-0.018 (0.046)	0.692	0.009 (0.047)	0.849	-0.058 (0.046)	0.214	0.047 (0.047)	0.32	-0.086 (0.031)	0.006	0.003(0.045)	0.943	-0.027(0.046)	0.548
Transmission period
pre-decline		reference		reference		reference		reference		reference		reference		reference
Deline	0.05 (0.054)	0.347	0.051 (0.055)	0.353	-0.057 (0.054)	0.294	0 (0.056)	0.995	-0.149 (0.036)	<0.001	-0.132 (0.053)	0.013	0.073 (0.054)	0.176
post-decline	-0.119 (0.057)	0.035	-0.064 (0.059)	0.279	0.148 (0.057)	0.01	0.038 (0.059)	0.52	-0.474 (0.036)	<0.001	-0.165 (0.057)	0.004	-0.013 (0.058)	0.818
correlation between inflammation and parasitemia
		PfHRP2	parasite count
F1	Estimate(SE)	-0.318 (0.065)	0.166 (0.065)
	Pvalue	<0.001	0.011
F2	Estimate(SE)	0.06 (0.042)	-0.212 (0.043)
	Pvalue	0.155	<0.001
F3	Estimate(SE)	-0.011 (0.032)	0.006 (0.033)
	Pvalue	0.725	0.862
F4	Estimate(SE)	0.37 (0.046)	0.344 (0.048)
	Pvalue	<0.001	<0.001
F5	Estimate(SE)	-0.014 (0.03)	0.025 (0.031)
	Pvalue	0.643	0.43
predictions: impact of inflammation on within host environmental stressors that is nutritional avaliability as represented by lysoPC and fever (temperature)
	lysoPC(16:0)			Temperature
	Estimate (SE)	pvalue		Estimate (SE)	pvalue
inflammation
F1	0.047 (0.117)	0.688		0.457 (0.065)	<0.001
F2	0.088 (0.074)	0.23		-0.028 (0.049)	0.573
F3	-0.048 (0.048)	0.318		-0.069 (0.032)	0.029
F4	-0.364 (0.087)	<0.001		0.155 (0.056)	0.006
F5	0.101 (0.045)	0.026		-0.113 (0.031)	<0.001
PfHRP2	-0.128 (0.071)	0.071		-0.039 (0.043)	0.374
Parasite count	-0.038 (0.068)	0.574		0.028 (0.042)	0.507
prediction: impact of within host stressors on expression of ap2-g, pfsir2a and var genes
	ap2-g			Pfsir2a		group B vars		group A vars
within host stressors	Estimate (SE)	pvalue		Estimate (SE)	pvalue	Estimate (SE)	pvalue	Estimate (SE)	pvalue
Temperature	0.097(0.046)	0.035		0.116 (0.045)	0.01	0.251 (0.044)	<0.001	0.135 (0.046)	0.003
LysoPC16:0	-0.176(0.076)	0.021		-0.323 (0.073)	<0.001	-0.183 (0.062)	0.003	-0.136 (0.065)	0.037
correlations
	Pfsir2a	ap2-g	group B var	group A var
PfHRP2	-0.146 (0.04)
	<0.001
Parasite count	0.009 (0.037)
	0.797
Pfsir2a		0.427 (0.04)	0.368 (0.04)	0.27 (0.042)
		<0.001	<0.001	<0.001
AP2G			0.35 (0.039)	0.162 (0.043)
			<0.001	<0.001
group A vars			0.335 (0.039)
			<0.001
